# Supplementary material
Source: PubMed Central journal article supplement (PMC9437831)

## Supplemental Online Content

Conroy T, Castan F, Lopez A, et al; Canadian Cancer Trials Group and the Unicancer-GI-PRODIGE Group. Five-year outcomes of FOLFIRINOX vs gemcitabine as adjuvant therapy for pancreatic cancer: a randomized clinical trial. *JAMA Oncol*. Published online September 1, 2022. doi:10.1001/jamaoncol.2022.3829

**eTable 1.** Baseline Demographic and Clinical Characteristics in the Intention-to-Treat Population

**eTable 2.** Disease-free survival events and sites of first metastases recurrences

**eTable 3.** Median overall survival from date of metastasis recurrence (OSr) according to the site of first recurrence

**eTable 4.** Treatments administered at relapse

**eTable 5.** Univariate analysis of prognostic factors present at study inclusion for overall survival

**eFigure 1.** CONSORT Diagram of Participant Enrollment

**eFigure 2.** Kaplan-Meier analysis of Overall survival according to chemotherapy completion (Landmark method)

**eFigure 3.** Kaplan-Meier analysis of Overall survival from relapse according to the time from end of chemotherapy to relapse

This supplemental material has been provided by the authors to give readers additional information about their work.

**eTable 1. Baseline Demographic and Clinical Characteristics in the Intention-to-Treat Population.**

| Characteristic, n (%)                 | mFOLFIRINOX<br>(N = 247) | Gemcitabine<br>(N = 246) |
|---------------------------------------|--------------------------|--------------------------|
| Age, years, median (range)            | 63 (30–79)               | 64 (30–81)               |
| ≥70 years                             | 47 (19.0)                | 54 (21.9)                |
| Male sex                              | 142 (57.5)               | 135 (54.9)               |
| WHO performance status <sup>a</sup>   |                          |                          |
| 0                                     | 122 (49.8)               | 128 (52.2)               |
| 1                                     | 123 (50.2)               | 117 (47.8)               |
| Status of surgical margins            |                          |                          |
| R0                                    | 148 (59.9)               | 134 (54.5)               |
| R1                                    | 99 (40.1)                | 112 (45.5)               |
| Tumor histology <sup>b</sup>          |                          |                          |
| Ductal adenocarcinoma                 | 244 (98.8)               | 242 (98.4)               |
| Non-ductal carcinoma                  | 3 (1.2)                  | 3 (1.2)                  |
| Tumor stage                           |                          |                          |
| I                                     | 12 (4.9)                 | 14 (5.7)                 |
| IIA                                   | 43 (17.4)                | 47 (19.1)                |
| IIB                                   | 183 (74.1)               | 179 (72.8)               |
| III                                   | 1 (0.4)                  | 1 (0.4)                  |
| IV                                    | 8 (3.2)                  | 5 (2.0)                  |
| Tumor stage                           |                          |                          |
| pT1–2 / pT3–4                         | 31 (12.6) / 216 (87.4)   | 25 (10.2) / 221 (89.8)   |
| pN0 / pN1                             | 55 (22.3) / 192 (77.7)   | 61 (24.8) / 185 (75.2)   |
| Lymphovascular invasion <sup>c*</sup> | 154 (73.7)               | 135 (63.1)               |
| Perineural invasion <sup>d</sup>      | 205 (92.8)               | 207 (89.6)               |
| Surgery                               |                          |                          |
| Venous resection <sup>e</sup>         | 53 (21.6)                | 69 (28.2)                |
| Portal resection                      | 32 (13.0)                | 42 (17.1)                |
| SMV resection                         | 19 (7.7)                 | 25 (10.2)                |
| Arterial resection <sup>f</sup>       | 8 (3.2)                  | 7 (2.8)                  |
| Lymph node ratio <sup>g</sup>         |                          |                          |
| 0                                     | 57 (23.1)                | 61 (24.9)                |
| 0–0.20                                | 118 (47.8)               | 102 (41.6)               |
| 0.20–0.40                             | 53 (21.5)                | 57 (23.3)                |
| >0.40                                 | 19 (7.7)                 | 25 (10.2)                |

Note: no statistical difference between groups unless otherwise specified. \*P=0.02.

Data missing for: <sup>a</sup>2/1 patients; <sup>b</sup>0/1 patients; <sup>c</sup>38/32 patients; <sup>d</sup>26/15 patients; <sup>e</sup>2/1 patients; <sup>f</sup>0/1 patients; and <sup>g</sup>0/1 patients in the mFOLFIRINOX/gemcitabine groups, respectively.

mFOLFIRINOX, modified 5-fluorouracil, leucovorin, irinotecan, and oxaliplatin; SMV, superior mesenteric vein; WHO, World Health Organization.

**eTable 2. Disease-free survival events and sites of first metastases recurrences**

|                                      | <b>mFOLFIRINOX<br/>(N = 247)</b> | <b>Gemcitabine<br/>(N = 246)</b> |
|--------------------------------------|----------------------------------|----------------------------------|
| <b>Cause of first event, n (%)</b>   |                                  |                                  |
| <b>Any event</b>                     | <b>173 (70.0)</b>                | <b>194 (78.9)</b>                |
| Metastases                           | 94/173 (54.3)                    | 91/194 (46.9)                    |
| Locoregional recurrence              | 37/173 (21.4)                    | 44/194 (22.7)                    |
| Locoregional recurrence + metastases | 29/173 (16.8)                    | 47/194 (24.2)                    |
| Second cancer                        | 5/173 (2.9)                      | 8/194 (4.1)                      |
| Death without recurrence             | 8/173 (4.6)                      | 4/194 (2.1)                      |
| <b>Metastases as first event</b>     | <b>123</b>                       | <b>138</b>                       |
| <b>Number of metastasis sites</b>    |                                  |                                  |
| One site                             | 104/123 (84.6)                   | 114/137 (83.2)                   |
| Liver-only                           | 32/104 (30.8)                    | 46/114 (40.3)                    |
| Lung-only                            | 41/104 (39.4)                    | 28/114 (24.6)                    |
| Peritoneum-only                      | 17/104 (16.3)                    | 30/114 (26.3)                    |
| Other-only                           | 14/104 (13.5)                    | 10/114 (8.8)                     |
| 2 sites                              | 19/123 (15.4)                    | 22/137 (16.1)                    |
| 3 sites                              | 0                                | 1/137 (0.7)                      |
| Missing                              | 0                                | 1                                |

**eTable 3. Median overall survival from date of metastasis recurrence (OSr) according to the site of first recurrence (N=260)**

| <b>First metastases recurrences sites</b> | <b>N Event / N total</b> | <b>Median OSr (Months) [CI 95%]<sup>a</sup></b> |
|-------------------------------------------|--------------------------|-------------------------------------------------|
| Polymetastasis                            | 39/42                    | 10.3 [8.5-12.5]                                 |
| Liver-only                                | 69/78                    | 14.7 [11.5-18.9]                                |
| Lung-only                                 | 45/69                    | 26.0 [16.8-30.3]                                |
| Peritoneum-only                           | 43/47                    | 8.0 [5.1-11.2]                                  |
| Other-only                                | 21/24                    | 11.6 [9.5-24.0]                                 |

| <b>eTable 4. Treatments administered at relapse</b> |                                              |                                              |                |
|-----------------------------------------------------|----------------------------------------------|----------------------------------------------|----------------|
| <b>First relapse treatment, n (%)</b>               | <b>mFOLFIRINOX<br/>(N = 160)<sup>a</sup></b> | <b>Gemcitabine<br/>(N = 182)<sup>a</sup></b> | <b>p-value</b> |
| Chemotherapy                                        | 107 (66.9)                                   | 151 (83.0)                                   |                |
| FOLFIRINOX <sup>a</sup>                             | 22 (20.6)                                    | 112 (74.2)                                   |                |
| Gemcitabine-based <sup>a</sup>                      | 72 (67.3)                                    | 14 (9.3)                                     |                |
| Other <sup>b</sup>                                  | 13 (12.1)                                    | 25 (16.6)                                    |                |
| Chemoradiotherapy                                   | 5 (3.1)                                      | 3 (1.7)                                      |                |
| Radiotherapy                                        | 14 (8.8)                                     | 7 (3.9)                                      |                |
| Surgery                                             | 10 (6.3)                                     | 8 (4.4)                                      |                |
| None                                                | 15 (9.4)                                     | 7 (3.9)                                      |                |
|                                                     |                                              |                                              |                |
| <b>Any relapse treatment, n (%)</b>                 | <b>mFOLFIRINOX<br/>(N = 160)<sup>a</sup></b> | <b>Gemcitabine<br/>(N = 182)<sup>a</sup></b> |                |
| At least one treatment <sup>b</sup>                 |                                              |                                              | <b>0.032</b>   |
| No                                                  | 15 (9.9)                                     | 7 (4.0)                                      |                |
| Yes                                                 | 136 (90.1)                                   | 169 (96.0)                                   |                |
| Chemotherapy                                        | 126 (83.4)                                   | 163 (92.6)                                   | 0.010          |
| Radiotherapy and/or surgery                         | 41 (27.2)                                    | 29 (16.5)                                    | 0.019          |
| Radiotherapy                                        | 30 (19.9)                                    | 18 (10.2)                                    | 0.014          |
| Surgery                                             | 13 (8.6)                                     | 13 (7.4)                                     | 0.684          |

<sup>a</sup> Percentage of patients receiving chemotherapy as first relapse treatment.

mFOLFIRINOX, modified 5-fluorouracil, leucovorin, irinotecan, and oxaliplatin.

<sup>b</sup> Data missing for 9 and 6 patients in the mFOLFIRINOX and gemcitabine groups, respectively.

**eTable 5. Univariate analysis of prognostic factors present at study inclusion for overall survival.**

| Factor                                  | N Event/<br>N total | 5-year OS<br>(%) | HR (95% CI)      | P value          |
|-----------------------------------------|---------------------|------------------|------------------|------------------|
| Adjuvant therapy <sup>a</sup>           |                     |                  |                  |                  |
| Gemcitabine                             | 168/246             | 31.4             | 1                | <b>&lt;0.001</b> |
| mFOLFIRINOX                             | 136/247             | 43.2             | 0.68 (0.54–0.85) |                  |
| Center                                  |                     |                  |                  |                  |
| Inclusion of ≥10 patients               | 125/220             | 42.7             | 0.80 (0.64–1.00) | 0.051            |
| Inclusion of <10 patients               | 179/273             | 32.7             | 1                |                  |
| Sex                                     |                     |                  |                  |                  |
| Male                                    | 171/277             | 36.7             | 1                | 0.69             |
| Female                                  | 133/216             | 37.6             | 0.96 (0.76–1.20) |                  |
| Age                                     |                     |                  |                  |                  |
| <70 years                               | 236/392             | 38.9             | 0.80 (0.61–1.05) | 0.11             |
| ≥70 years                               | 68/101              | 30.0             | 1                |                  |
| WHO performance status                  |                     |                  |                  |                  |
| 0                                       | 148/250             | 39.4             | 0.88 (0.70–1.10) | 0.25             |
| 1                                       | 155/240             | 34.7             | 1                |                  |
| Diabetes                                |                     |                  |                  |                  |
| No                                      | 211/361             | 40.0             | 0.83 (0.65–1.06) | 0.14             |
| Yes                                     | 89/127              | 30.3             | 1                |                  |
| Tumor location <sup>b</sup>             |                     |                  |                  |                  |
| Head/Uncinate                           | 242/380             | 34.7             | 1                | <b>0.017</b>     |
| Other                                   | 62/113              | 44.9             | 0.72 (0.54–0.95) |                  |
| Head                                    | 237/372             | 34.8             | 1                | <b>0.06</b>      |
| Uncinate                                | 5/8                 | 33.3             | 1.05 (0.43–2.54) |                  |
| Other                                   | 62/113              | 44.9             | 0.72 (0.54–0.95) |                  |
| Histotype <sup>b</sup>                  |                     |                  |                  |                  |
| Pancreatic ductal adenocarcinoma        | 301/486             | 36.9             | 1                | 0.23             |
| Other                                   | 2/6                 | 60.0             | 0.48 (0.12–1.91) |                  |
| Tumor grading <sup>b</sup>              |                     |                  |                  |                  |
| Well differentiated                     | 88/149              | 41.6             | 0.70 (0.48–1.01) | 0.076            |
| Moderately differentiated               | 162/249             | 33.7             | 0.90 (0.64–1.26) |                  |
| Poorly differentiated/Un-differentiated | 42/64               | 29.5             | 1                |                  |
| Well differentiated                     | 88/149              | 41.6             | 0.76 (0.59–0.98) | <b>0.03</b>      |
| Moderately/Poorly/Un-differentiated     | 204/313             | 32.9             | 1                |                  |
| pT <sup>b</sup>                         |                     |                  |                  |                  |
| pT1–pT2                                 | 28/56               | 50.4             | 0.64 (0.44–0.95) | <b>0.019</b>     |
| pT3–pT4                                 | 276/437             | 35.3             | 1                |                  |
| pN <sup>b</sup>                         |                     |                  |                  |                  |
| pN0                                     | 56/116              | 51.5             | 0.59 (0.44–0.79) | <b>&lt;0.001</b> |
| pN1                                     | 248/377             | 32.6             | 1                |                  |
| Tumor staging <sup>b</sup>              |                     |                  |                  |                  |

|                                                 |         |      |                  |                  |
|-------------------------------------------------|---------|------|------------------|------------------|
| IA/IB                                           | 8/26    | 71.3 | 0.14 (0.05–0.38) | <b>&lt;0.001</b> |
| IIA                                             | 48/90   | 45.3 | 0.32 (0.15–0.68) |                  |
| IIB                                             | 240/362 | 33.2 | 0.46 (0.22–0.92) |                  |
| III/IV                                          | 8/15    | 0    | 1                |                  |
| Lymph nodes ratio                               |         |      |                  |                  |
| 0                                               | 58/118  | 51.9 | 0.37 (0.24–0.56) | <b>&lt;0.001</b> |
| 0–0.20                                          | 130/220 | 40.9 | 0.48 (0.33–0.71) |                  |
| 0.20–0.40                                       | 81/110  | 21.0 | 0.82 (0.55–1.23) |                  |
| >0.40                                           | 34/44   | 19.3 | 1                |                  |
| Number of lymph nodes retrieved                 |         |      |                  |                  |
| <12                                             | 62/100  | 38.4 | 1                | 0.77             |
| ≥12                                             | 241/392 | 36.8 | 0.96 (0.73–1.27) |                  |
| Excision procedure                              |         |      |                  |                  |
| Pancreaticoduodenectomy                         | 248/392 | 35.5 | 0.86 (0.54–1.00) | 0.11             |
| Distal pancreatectomy                           | 50/92   | 43.2 | 0.63 (0.52–2.62) |                  |
| Total pancreatectomy                            | 6/9     | 38.1 | 1                |                  |
| Resection status <sup>b</sup>                   |         |      |                  |                  |
| R0                                              | 150/282 | 43.4 | 0.59 (0.47–0.74) | <b>&lt;0.001</b> |
| R1                                              | 154/211 | 28.8 | 1                |                  |
| Venous resection                                |         |      |                  |                  |
| No                                              | 222/368 | 39.1 | 0.73 (0.57–0.94) | <b>0.019</b>     |
| Yes                                             | 80/122  | 30.7 | 1                |                  |
| Superior mesenteric vein resection <sup>b</sup> |         |      |                  |                  |
| No                                              | 276/449 | 38.1 | 0.63 (0.43–0.93) | <b>0.028</b>     |
| Yes                                             | 28/44   | 25.6 | 1                |                  |
| Portal vein resection <sup>b</sup>              |         |      |                  |                  |
| No                                              | 251/419 | 38.7 | 0.66 (0.49–0.88) | <b>0.008</b>     |
| Yes                                             | 53/74   | 28.3 | 1                |                  |
| Sampling paraaortic nodes <sup>b</sup>          |         |      |                  |                  |
| No                                              | 225/368 | 37.3 | 0.98 (0.75–1.27) | 0.86             |
| Yes                                             | 74/117  | 35.8 | 1                |                  |
| Lymphovascular invasion <sup>b</sup>            |         |      |                  |                  |
| No                                              | 77/134  | 41.5 | 0.79 (0.60–1.02) | 0.07             |
| Yes                                             | 186/289 | 33.1 | 1                |                  |
| Postoperative CA19-9 level                      |         |      |                  |                  |
| ≤90 U/mL                                        | 282/457 | 37.2 | 0.86 (0.56–1.33) | 0.51             |
| >90 U/mL                                        | 22/36   | 35.3 | 1                |                  |
| Time-to adjuvant-treatment                      |         |      |                  |                  |
| ≤8 weeks                                        | 142/211 | 34.9 | 1                | 0.42             |
| >8 weeks                                        | 161/270 | 39.1 | 0.91 (0.73–1.14) |                  |

<sup>a</sup> Stratified Cox model and log-rank test on lymph node status, resection margins, and post-operative CA19-9 only for arm.

<sup>b</sup> Centralized review.

CI, confidence interval; HR, hazard ratio; mFOLFIRINOX, modified 5-fluorouracil, leucovorin, irinotecan, and oxaliplatin; OS, overall survival.

**eFigure 1. CONSORT Diagram of Participant Enrollment**

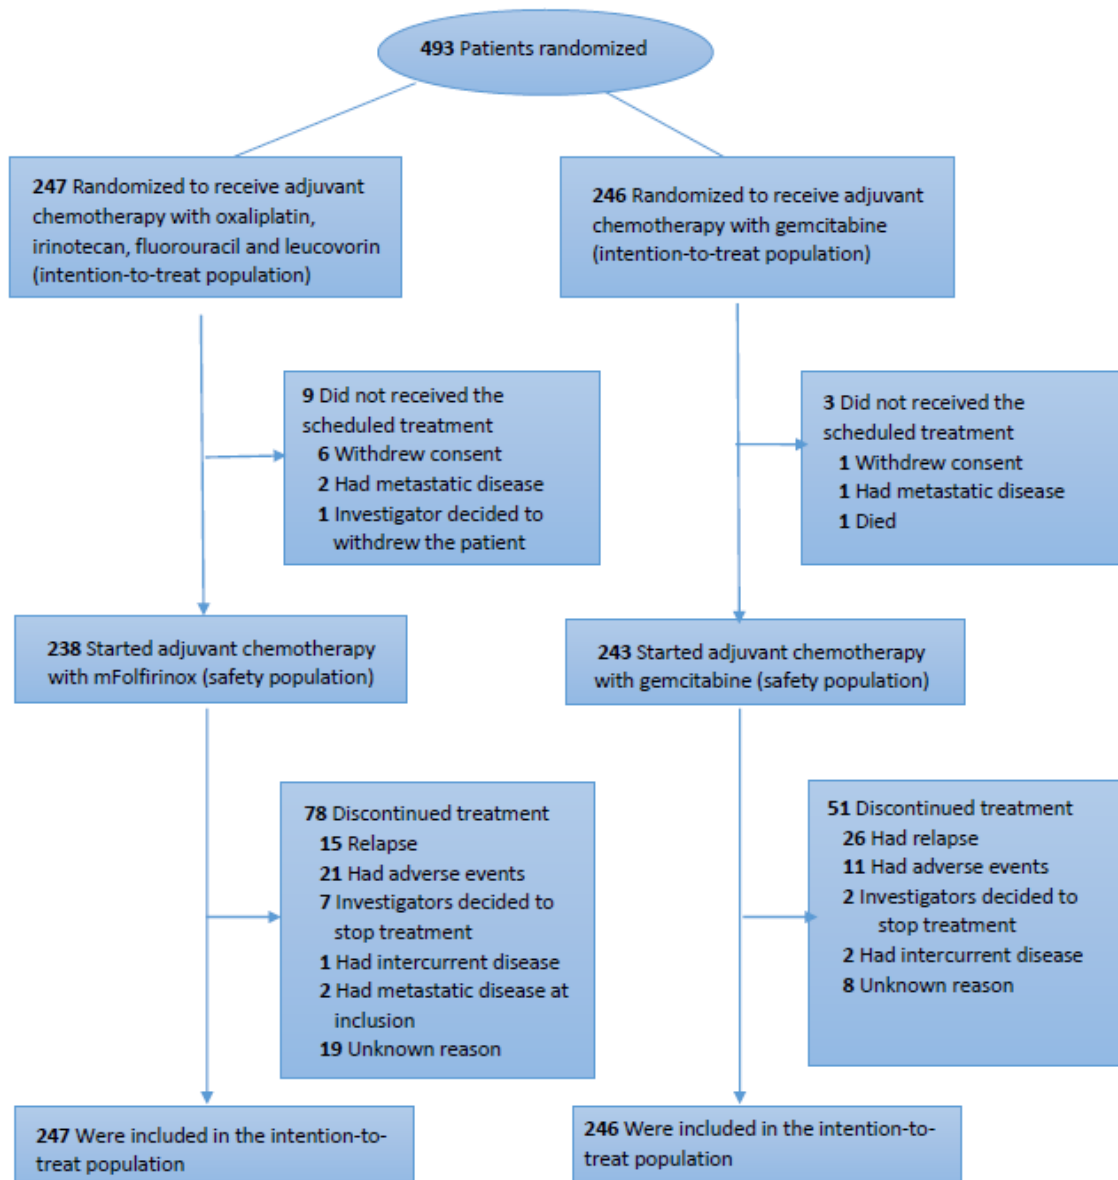



**eFigure 2. Kaplan-Meier analysis of Overall survival according to chemotherapy completion (Landmark method)**

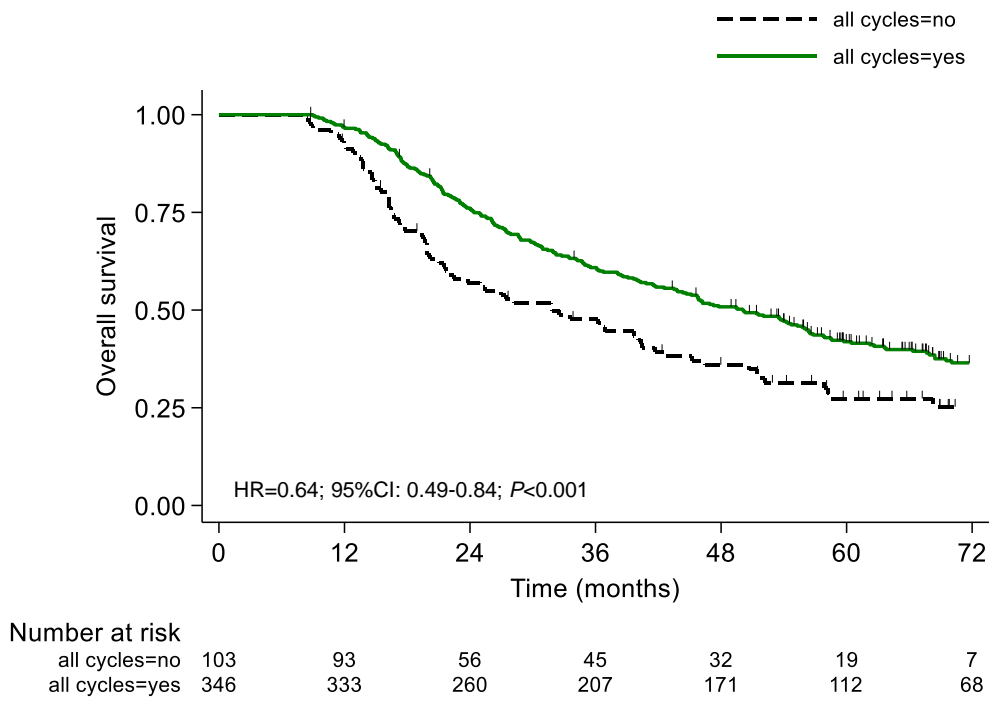

**eFigure 3. Kaplan-Meier analysis of Overall survival from relapse according to the time from end of chemotherapy to relapse:**

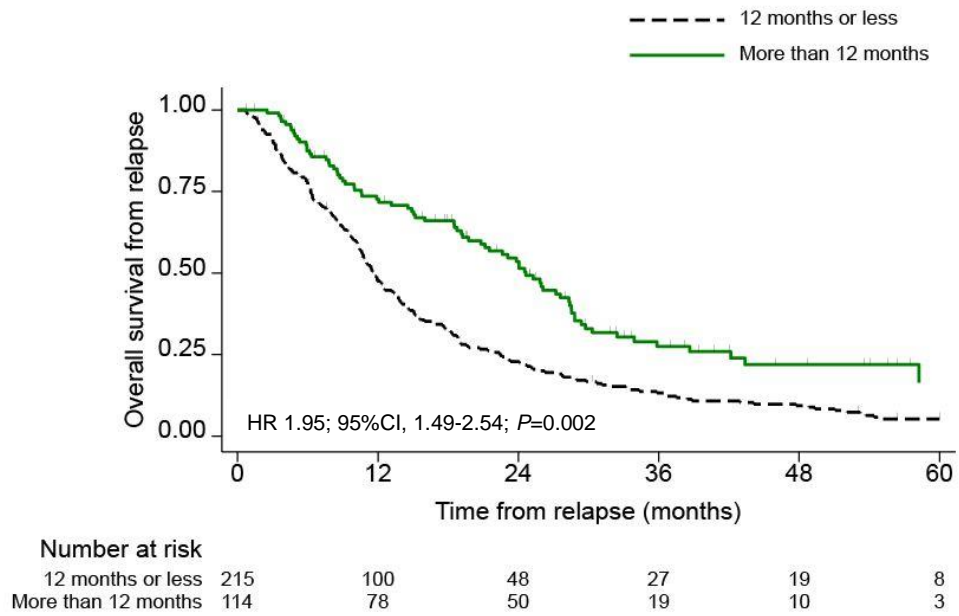

Supplement: jamaoncol-e223829-s002.pdf [file jamaoncol-e223829-s002.pdf]
