# Supplementary material
Source: PubMed Central journal article supplement (PMC9437831)
Supplement: jamaoncol-e223829-s003.pdf [file jamaoncol-e223829-s003.pdf]

\*First name, last name, and suffix (if applicable) are required and will appear in PubMed.

| <b>*Group Name(s): Canadian Cancer Trials Group and the Unicancer-GI-PRODIGE Group</b> |                    |                              |                  |                                        |                                          |                                                         |                                                                                            |
|----------------------------------------------------------------------------------------|--------------------|------------------------------|------------------|----------------------------------------|------------------------------------------|---------------------------------------------------------|--------------------------------------------------------------------------------------------|
| <b>*First Name and Middle Initial(s)</b>                                               | <b>*Last Name</b>  | <b>*Suffix (eg, Jr, III)</b> | Academic Degrees | Institution                            | Location (city, state/province, country) | Role or Contribution, eg, chair, principal investigator | Group (if more than 1 Group listed in the byline) and/or Subgroup (eg, Steering Committee) |
| Eric                                                                                   | Francois           |                              | MD               | Centre Antoine-Lacassagne              | Nice, France                             | Principal investigator                                  | PRODIGE                                                                                    |
| Jean-François                                                                          | Ramee              |                              | MD               | Centre Catherine de Sienne             | Nantes, France                           | ex-Principal investigator                               | PRODIGE                                                                                    |
| Hélène                                                                                 | Castanie           |                              | MD               | Centre Catherine de Sienne             | Nantes, France                           | Principal investigator                                  | PRODIGE                                                                                    |
| Marc                                                                                   | Pracht             |                              | MD               | Centre Eugène Marquis                  | Rennes, France                           | Principal investigator                                  | PRODIGE                                                                                    |
| François                                                                               | Ghiringhelli       |                              | MD               | Centre Georges François Leclerc        | Dijon, France                            | Principal investigator                                  | PRODIGE                                                                                    |
| Emmanuel                                                                               | Maillard           |                              | MD               | Centre hospitalier Annecy Genevois     | Pringy, France                           | Principal investigator                                  | PRODIGE                                                                                    |
| Caroline                                                                               | Couffon            |                              | MD               | Centre hospitalier Bretagne Sud        | Lorient, France                          | Principal investigator                                  | PRODIGE                                                                                    |
| Julien                                                                                 | Volet              |                              | MD               | Centre hospitalier de Reims            | Reims, France                            | ex-Principal investigator                               | PRODIGE                                                                                    |
| Vincent                                                                                | Bourgeois          |                              | MD               | Centre hospitalier Duchesne            | Boulogne sur Mer, France                 | Principal investigator                                  | PRODIGE                                                                                    |
| Marion                                                                                 | Chauvenet          |                              | MD               | Centre hospitalier Lyon Sud            | Pierre benite, France                    | Principal investigator                                  | PRODIGE                                                                                    |
| Jean-Frédéric                                                                          | Blanc              |                              | MD               | Centre hospitalier Saint André         | Bordeaux, France                         | Principal investigator                                  | PRODIGE                                                                                    |
| Denis                                                                                  | Péré-Vergé         |                              | MD               | Centre hospitalier St Joseph St Luc    | Lyon, France                             | Principal investigator                                  | PRODIGE                                                                                    |
| Christelle                                                                             | De La Fouchardiere |                              | MD               | Centre Léon Bérard                     | Lyon, France                             | Principal investigator                                  | PRODIGE                                                                                    |
| Antoine                                                                                | Adenis             |                              | MD               | Centre Oscar Lambret                   | Lille, France                            | ex-Principal investigator                               | PRODIGE                                                                                    |
| Farid                                                                                  | El Hajbi           |                              | MD               | Centre Oscar Lambret                   | Lille, France                            | Principal investigator                                  | PRODIGE                                                                                    |
| Jaafar                                                                                 | Bennouna           |                              | MD               | Centre René Gauducheau                 | Saint Herblain, France                   | Principal investigator                                  | PRODIGE                                                                                    |
| Patrick                                                                                | Texereau           |                              | MD               | CH Layné                               | Mont de Marsan, France                   | Principal investigator                                  | PRODIGE                                                                                    |
| Roger                                                                                  | Faroux             |                              | MD               | CHD Vendée                             | La Roche sur Yon, France                 | ex-Principal investigator                               | PRODIGE                                                                                    |
| Laurent                                                                                | Miglianico         |                              | MD               | CHP Saint-Grégoire                     | Saint-Grégoire, France                   | Principal investigator                                  | PRODIGE                                                                                    |
| Christian                                                                              | Platini            |                              | MD               | CHR Metz-Thionville/Hôpital Bonsecours |                                          | Principal investigator                                  | PRODIGE                                                                                    |
| Jean-Louis                                                                             | Legoux             |                              | MD               | CHR Orléans - La Source                | Orléans, France                          | Principal investigator                                  | PRODIGE                                                                                    |

## Supplemental Online Content: Nonauthor Collaborators

\*First name, last name, and suffix (if applicable) are required and will appear in PubMed.

| *First Name and Middle Initial(s) | *Last Name        | *Suffix (eg, Jr, III) | Academic Degrees | Institution                                | Location (city, state/province, country) | Role or Contribution, eg, chair, principal investigator | Group (if more than 1 Group listed in the byline) and/or Subgroup (eg, Steering Committee) |
|-----------------------------------|-------------------|-----------------------|------------------|--------------------------------------------|------------------------------------------|---------------------------------------------------------|--------------------------------------------------------------------------------------------|
| François-Xavier                   | Caroli-Bosc       |                       | MD               | CHU Angers                                 | Angers, France                           | Principal investigator                                  | PRODIGE                                                                                    |
| Karine                            | Bouhier-Leporrier |                       | MD               | CHU Côte de Nacre                          | Caen, France                             | Principal investigator                                  | PRODIGE                                                                                    |
| Alice                             | Gagnaire          |                       | MD               | CHU de Dijon - Site Bocage                 | Dijon, France                            | Principal investigator                                  | PRODIGE                                                                                    |
| Victoire                          | Granger           |                       | MD               | CHU de Grenoble - Hôp. Michallon           | Grenoble, France                         | Principal investigator                                  | PRODIGE                                                                                    |
| Valérie                           | Lebrun-Ly         |                       | MD               | CHU de Limoges                             | Limoges, France                          | Principal investigator                                  | PRODIGE                                                                                    |
| Rosine                            | Guimbaud          |                       | MD               | CHU de Toulouse - Rangueil                 | Toulouse, France                         | Principal investigator                                  | PRODIGE                                                                                    |
| Yann                              | Touchefeu         |                       | MD               | CHU Hôtel Dieu                             | Nantes, France                           | Principal investigator                                  | PRODIGE                                                                                    |
| Mohamed                           | Gasmi             |                       | MD               | CHU Nord                                   | Marseille, France                        | Principal investigator                                  | PRODIGE                                                                                    |
| Frédéric                          | Di Fiore          |                       | MD               | CHU Rouen                                  | Rouen, France                            | Principal investigator                                  | PRODIGE                                                                                    |
| Jean François                     | Seitz             |                       | MD               | CHU Timone Adulte                          | Marseille, France                        | Principal investigator                                  | PRODIGE                                                                                    |
| Pierre-Luc                        | Etienne           |                       | MD               | Clinique Armoricaine de Radiologie         | Saint-Brieuc, France                     | Principal investigator                                  | PRODIGE                                                                                    |
| Catherine                         | Ligeza Poisson    |                       | MD               | Clinique Mutualiste de l'Estuaire          | Saint Nazaire, France                    | Principal investigator                                  | PRODIGE                                                                                    |
| Yves                              | Rinaldi           |                       | MD               | Fondation Ambroise Paré / Hôpital Européen | Marseille, France                        | Principal investigator                                  | PRODIGE                                                                                    |
| Nabil                             | Baba-Hamed        |                       | MD               | Groupe Hospitalier Paris Saint Joseph      | Paris, France                            | Principal investigator                                  | PRODIGE                                                                                    |
| Jean Baptiste                     | Bachet            |                       | MD               | Groupe Hospitalier Pitié-Salpêtrière       | Paris, France                            | Principal investigator                                  | PRODIGE                                                                                    |
| Thomas                            | Aparicio          |                       | MD               | Hôpital Avicenne                           | Bobigny, France                          | Principal investigator                                  | PRODIGE                                                                                    |
| Laurence                          | Chone             |                       | MD               | Hôpital de Brabois-CHU de Nancy            | Nancy, France                            | ex-Principal investigator                               | PRODIGE                                                                                    |
| Marielle                          | Guillet           |                       | MD               | Hôpital de la Croix-Rousse                 | Lyon, France                             | Principal investigator                                  | PRODIGE                                                                                    |
| Julien                            | Forestier         |                       | MD               | Hôpital Edouard Herriot                    | Lyon, France                             | Principal investigator                                  | PRODIGE                                                                                    |
| Eric                              | Terrebonne        |                       | MD               | Hôpital Haut-Lévêque                       | Pessac, France                           | Principal investigator                                  | PRODIGE                                                                                    |
| Mohamed                           | Hebbar            |                       | MD               | Hôpital Huriez                             | Lille, France                            | ex-Principal investigator                               | PRODIGE                                                                                    |
| Gilles                            | Breysacher        |                       | MD               | Hôpital Louis Pasteur                      | Colmar, France                           | Principal investigator                                  | PRODIGE                                                                                    |
| Thierry                           | Andre             |                       | MD               | Hôpital Saint-Antoine                      | Paris, France                            | Principal investigator                                  | PRODIGE                                                                                    |

## Supplemental Online Content: Nonauthor Collaborators

\*First name, last name, and suffix (if applicable) are required and will appear in PubMed.

| *First Name and Middle Initial(s) | *Last Name     | *Suffix (eg, Jr, III) | Academic Degrees | Institution                                                | Location (city, state/province, country) | Role or Contribution, eg, chair, principal investigator | Group (if more than 1 Group listed in the byline) and/or Subgroup (eg, Steering Committee) |
|-----------------------------------|----------------|-----------------------|------------------|------------------------------------------------------------|------------------------------------------|---------------------------------------------------------|--------------------------------------------------------------------------------------------|
| Faiza                             | Khemissa-Akouz |                       | MD               | Hôpital Saint-Jean                                         | Perpignan, France                        | Principal investigator                                  | PRODIGE                                                                                    |
| Vincent                           | Hautefeuille   |                       | MD               | Hopital Sud                                                | Amiens, France                           | Principal investigator                                  | PRODIGE                                                                                    |
| Véronique                         | Guerin-Meyer   |                       | MD               | ICO Paul Papin                                             | Angers, France                           | Principal investigator                                  | PRODIGE                                                                                    |
| Johannes                          | Hartwig        |                       | MD               | Infirmierie protestante                                    | Caluire et Cuire, France                 | Principal investigator                                  | PRODIGE                                                                                    |
| Yves                              | Becouarn       |                       | MD               | Institut Bergonié                                          | Bordeaux                                 | Principal investigator                                  | PRODIGE                                                                                    |
| David                             | Malka          |                       | MD               | Institut Gustave Roussy                                    | Villejuif, France                        | Principal investigator                                  | PRODIGE                                                                                    |
| Christophe                        | Louvet         |                       | MD               | Institut Mutualiste Montsouris                             | Paris, France                            | Principal investigator                                  | PRODIGE                                                                                    |
| Jean-Luc                          | Raoul          |                       | MD               | Institut Paoli Calmettes                                   | Marseille, France                        | ex-Principal investigator                               | PRODIGE                                                                                    |
| Laurent                           | Cany           |                       | MD               | Polyclinique Francheville                                  | Périgueux, France                        | Principal investigator                                  | PRODIGE                                                                                    |
| Beata                             | Juzina         |                       | Eng              | R&D Unicancer                                              | Paris, France                            | Project manager                                         | Unicancer                                                                                  |
| Claire                            | Jouffroy       |                       | PharmD           | R&D Unicancer                                              | Paris, France                            | Project manager                                         | Unicancer                                                                                  |
| Sophie                            | Gourgou        |                       | MSc              | Institut Régional du Cancer de Montpellier / Val d'Aurelle | Montpellier, France                      | Statistician                                            | Unicancer                                                                                  |
| Mohammad                          | Rassouli       |                       | MD               | Algoma District Cancer Program<br>Sault Area Hospital      | Sault Ste Marie, ON,<br>Canada           | Principal investigator                                  | CCTG                                                                                       |
| Haji                              | Chalchal       |                       | MD               | Allan Blair Cancer Centre                                  | Regina, SK, Canada                       | Principal investigator                                  | CCTG                                                                                       |
| Daniel                            | Renouf         |                       | MD               | BCCA - Vancouver Cancer Centre                             | Vancouver, BC, Canada                    | Principal investigator                                  | CCTG                                                                                       |
| Ralph                             | Wong           |                       | MD               | CancerCare Manitoba                                        | Winnipeg, MB, Canada                     | Principal investigator                                  | CCTG                                                                                       |
| Frederic                          | Lemay          |                       | MD               | Centre hospitalier universitaire de Sherbrooke             | Sherbrooke, QC, Canada                   | Principal investigator                                  | CCTG                                                                                       |
| Francine                          | Aubin          |                       | MD               | CHUM - Pavillon Saint-Luc                                  | Montreal, QC, Canada                     | Principal investigator                                  | CCTG                                                                                       |
| Felix                             | Couture        |                       | MD               | CHUQ - Hotel-Dieu de Quebec                                | Quebec, QC, Canada                       | Principal investigator                                  | CCTG                                                                                       |
| Elaine                            | Mc Whirter     |                       | MD               | Juravinski Cancer Centre at Hamilton Health Sciences       | Hamilton, ON, Canada                     | Principal investigator                                  | CCTG                                                                                       |
| Stephen                           | Welch          |                       | MD               | London Regional Cancer Program                             | London, ON, Canada                       | Principal investigator                                  | CCTG                                                                                       |
| Petr                              | Kavan          |                       | MD               | McGill University                                          | Montreal, QC, Canada                     | Principal investigator                                  | CCTG                                                                                       |
| Brian                             | Findlay        |                       | MD               | Niagara Health System                                      | St. Catharines, ON,<br>Canada            | Principal investigator                                  | CCTG                                                                                       |

## Supplemental Online Content: Nonauthor Collaborators

\*First name, last name, and suffix (if applicable) are required and will appear in PubMed.

| *First Name and Middle Initial(s) | *Last Name  | *Suffix (eg, Jr, III) | Academic Degrees | Institution                                                                                   | Location (city, state/province, country) | Role or Contribution, eg, chair, principal investigator | Group (if more than 1 Group listed in the byline) and/or Subgroup (eg, Steering Committee) |
|-----------------------------------|-------------|-----------------------|------------------|-----------------------------------------------------------------------------------------------|------------------------------------------|---------------------------------------------------------|--------------------------------------------------------------------------------------------|
| Christine                         | Cripps      |                       | MD               | Ottawa Health Research Institute - General Division                                           | Ottawa, ON, Canada                       | Principal investigator                                  | CCTG                                                                                       |
| Pablo                             | Cano        |                       | MD               | Regional Cancer Program of the Hopital Regional de Sudbury Regional Hospital                  | Sudbury, ON, Canada                      | Principal investigator                                  | CCTG                                                                                       |
| Shahid                            | Ahmed       |                       | MD               | Saskatoon Cancer Centre                                                                       | Saskatoon, SK, Canada                    | Principal investigator                                  | CCTG                                                                                       |
| Mohammed                          | Harb        |                       | MD               | The Moncton Hospital                                                                          | Moncton, NB, Canada                      | Principal investigator                                  | CCTG                                                                                       |
| Bryn                              | Pressnail   |                       | MD               | The Royal Victoria Hospital                                                                   | Barrie, ON, Canada                       | Principal investigator                                  | CCTG                                                                                       |
| Scott                             | Dowden      |                       | MD               | Tom Baker Cancer Centre                                                                       | Calgary, AB, Canda                       | Principal investigator                                  | CCTG                                                                                       |
| Chris                             | O'Callaghan |                       | DVM              | NCIC cancer clinical trials group; n10 Stuart Street; Queen's University Kingston, ON K7L 3N6 | KINGSTON, Canada                         | Project Coordinator<br>NCIC Clinical Trials Group       | CCTG                                                                                       |
