# Supplementary material
Source: PubMed Central journal article supplement (PMC9437831)
Supplement: jamaoncol-e223829-s004.pdf [file jamaoncol-e223829-s004.pdf]

## Data Sharing Statement

Conroy. Five-Year Outcomes of FOLFIRINOX vs Gemcitabine as Adjuvant Therapy for Pancreatic Cancer. *JAMA Oncol*. Published September 01, 2022.

doi:10.1001/jamaoncol.2022.3829

### Data

**Data available:** Yes

**Data types:** Other (please specify)

**Additional Information:** The study data will be available following publication to researchers wishing to do meta-analyses or for other research proposals, subject to approval and agreement from the study sponsor (R&D Unicancer). Requests should be made to [I-monard@unicancer.fr](mailto:I-monard@unicancer.fr).

**How to access data:** Requests should be made to [I-monard@unicancer.fr](mailto:I-monard@unicancer.fr).

**When available:** With publication

### Supporting Documents

**Document types:** Other (please specify)

**Additional Information:** Informed consent form will be made available on request to [I-monard@unicancer.fr](mailto:I-monard@unicancer.fr).

**How to access documents:** Informed consent form will be made available on request to [I-monard@unicancer.fr](mailto:I-monard@unicancer.fr).

**When available:** With publication

### Additional Information

**Who can access the data:** Any researcher with agreement from the study sponsor (R&D Unicancer).

**Types of analyses:** Requests should be made to [I-monard@unicancer.fr](mailto:I-monard@unicancer.fr).

**Mechanisms of data availability:** With Principal investigator support
